# Supplementary material for: Two-stage (photoautotrophy and heterotrophy) cultivation enables efficient production of bioplastic poly-3-hydroxybutyrate in auto-sedimenting cyanobacterium
Source: PubMed Central journal article supplement (PMC5109257; doi:10.1038/srep37121), 2016-11-15
Supplement: srep37121-s1.pdf [file srep37121-s1.pdf]

*Supplementary information*

**Two-stage (photoautotrophy and heterotrophy) cultivation enables efficient production of bioplastic poly-3-hydroxybutyrate in auto-sedimenting cyanobacterium**

**Tanakarn Monshupanee\*, Palida Nimdach and Aran Incharoensakdi**

Department of Biochemistry, Faculty of Science, Chulalongkorn University, Bangkok 10330, Thailand. \*Correspondence: tanakarn.m@chula.ac.th

**Fig. S1.**  $^1\text{H-NMR}$  (upper) and  $^{13}\text{C-NMR}$  (lower) spectra of the purified PHB from *C. fritschii*. Cells were cultured as described in Fig. 4. NMR peaks matching to each hydrogen and carbon atoms in the PHB chemical structure are marked by numerical numbers.

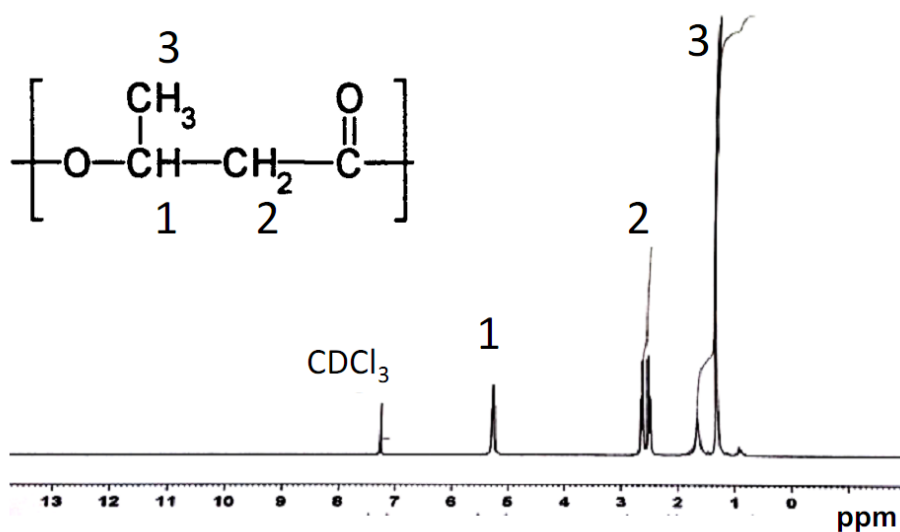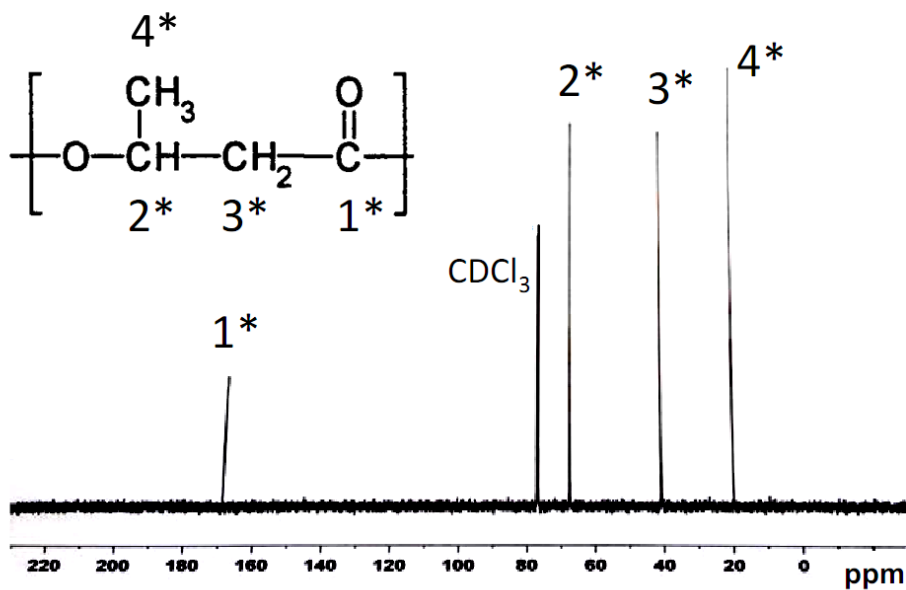

----- end page -----
